# Supplementary material for: Intrathecal IGF2 siRNA injection provides long-lasting anti-allodynic effect in a spared nerve injury rat model of neuropathic pain
Source: PubMed Central journal article supplement (PMC8638935; doi:10.1371/journal.pone.0260887), 2021-12-02

Figure 4 left-upper

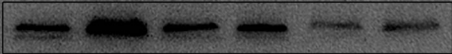

Figure 4 left-lower

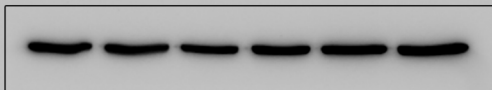

Figure 4 middle-upper

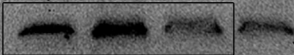

Figure 4 middle-lower

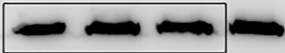

Figure 4 right-upper

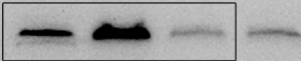

Figure 4 right-lower

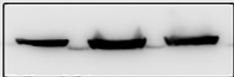

Supplement: pone.0260887.s001.pdf [file pone.0260887.s001.pdf]
